# Supplementary material for: Li-modified BaCoO3−δ for thermochemical energy storage: enhanced reaction performance and modification mechanism
Source: Royal Society of Chemistry journal article supplement (doi:10.1039/d4ta05176a), 2024-01-01
Supplement: d4ta05176a1.pdf [file d4ta05176a1.pdf]

1 **Supplementary Information**

2 **Li-Modified BaCoO<sub>3-δ</sub> for Thermochemical Energy Storage: Enhanced Reaction**

3 **Performance and Modification Mechanism**

4 *Zeyu Ning<sup>a</sup>, Changdong Gu<sup>b</sup>, Yibin He<sup>a</sup>, Haoran Xu<sup>a</sup>, Peiwang Zhu<sup>a</sup>, Jinsong Zhou<sup>a,\*</sup>,*

5 *Gang Xiao<sup>a,\*</sup>*

6 <sup>a</sup> State Key Laboratory of Clean Energy Utilization, Institute for Thermal Power

7 Engineering,

8 <sup>b</sup> State Key Laboratory of Silicon Materials, College of Materials Science and

9 Engineering,

10 Zhejiang University, Hangzhou 310027, P.R.China

11 \*Corresponding authors.

12 E-mail addresses: [zhoujs@zju.edu.cn](mailto:zhoujs@zju.edu.cn) (J. Zhou), [xiaogangtianmen@zju.edu.cn](mailto:xiaogangtianmen@zju.edu.cn) (G. Xiao).

13 **Table S1.** Peak position data of BaO (ICCD PDF #04-005-4400)

| $2\theta$ | $d(\text{\AA})$ | $I(f)$ | (h k l) |
|-----------|-----------------|--------|---------|
| 27.922    | 3.1928          | 100    | (1 1 1) |
| 32.352    | 2.765           | 83.4   | (2 0 0) |
| 46.405    | 1.9552          | 50.8   | (2 2 0) |
| 55.031    | 1.6674          | 35.9   | (3 1 1) |
| 57.701    | 1.5964          | 15.3   | (2 2 2) |
| 67.721    | 1.3825          | 6.2    | (4 0 0) |
| 74.77     | 1.2687          | 11.9   | (3 3 1) |
| 77.062    | 1.2366          | 15.2   | (4 2 0) |

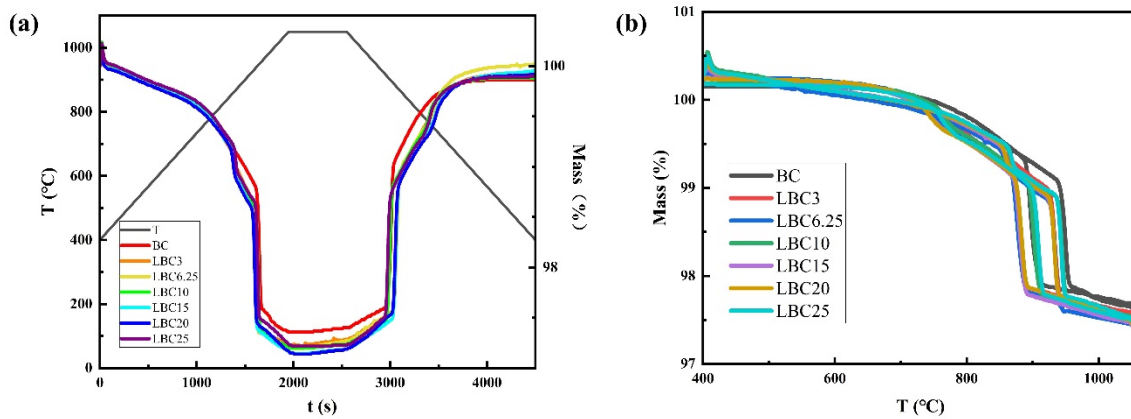

14

15 **Figure S1.** The raw TG data (a) and the thermogravimetric hysteresis curve (b) of  $\text{BaCoO}_{3-\delta}$ .

16  $\delta$  and  $\text{Li}_x\text{Ba}_{1-x}\text{CoO}_{3-\delta}$ ;

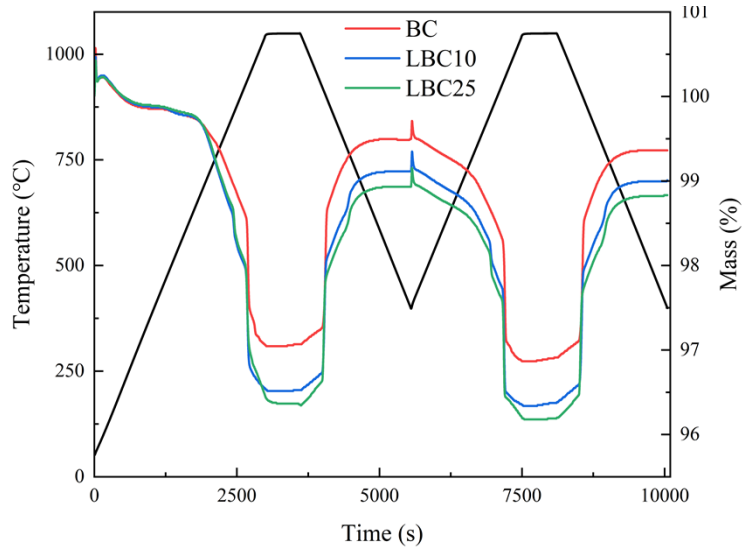

17

18 **Figure S2.** The TG results of two cycles for BC, LBC10, and LBC25;

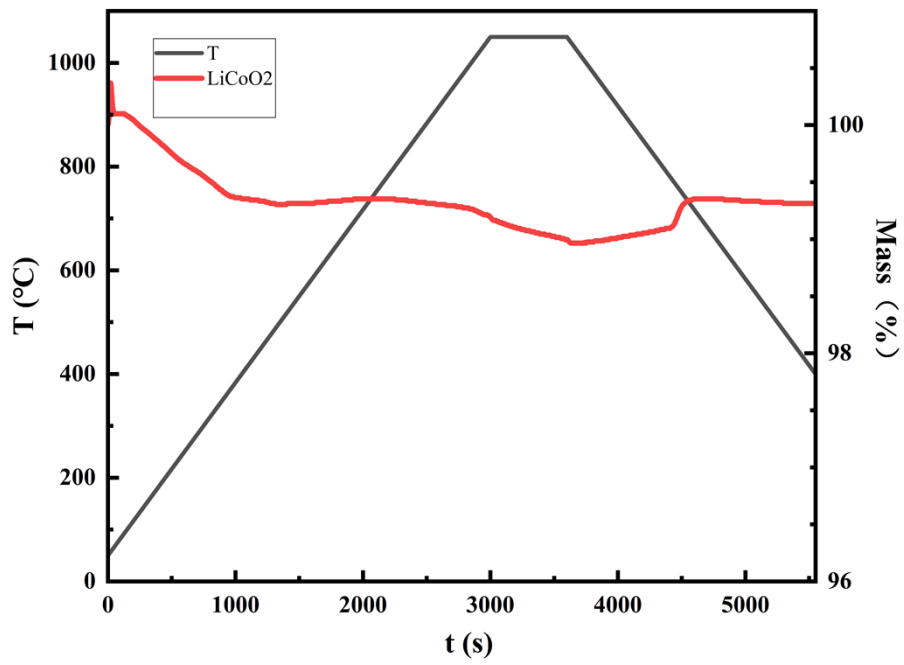

19

20 **Figure S3.** The TG results of LiCoO<sub>2</sub> sample;

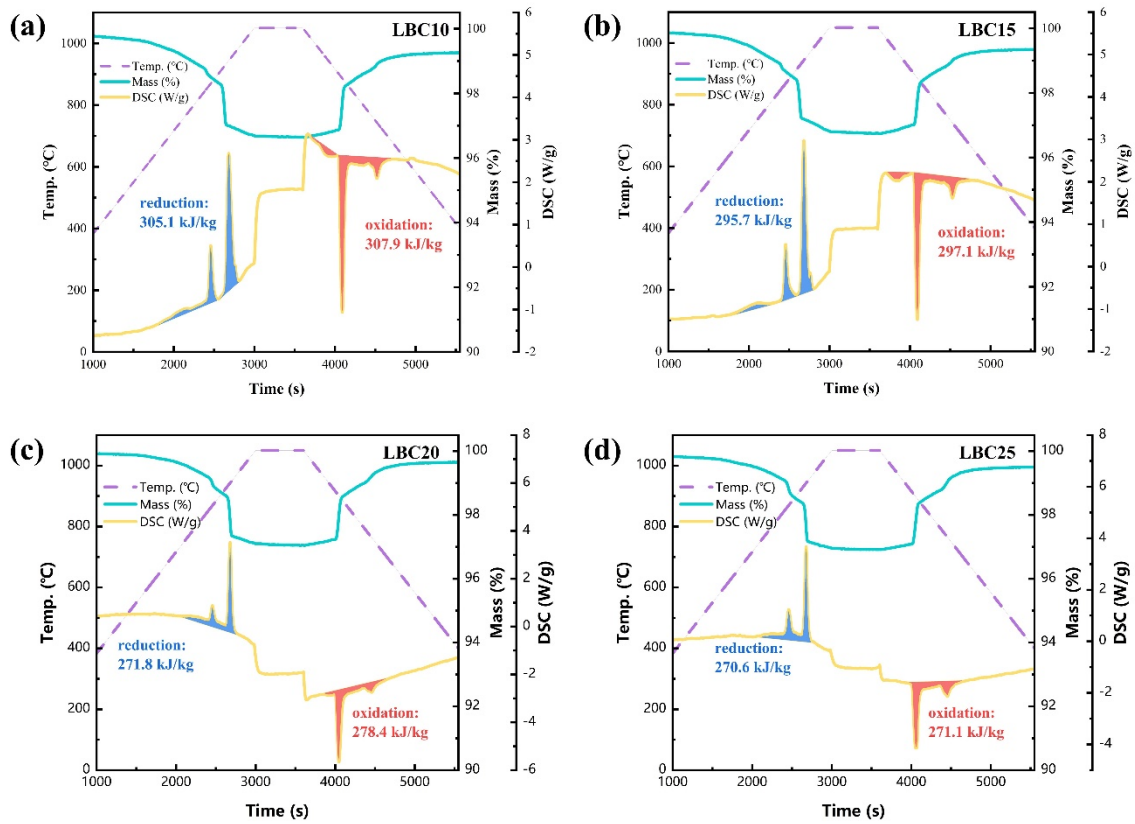

21

22 **Figure S4.** DSC results of the thermal storage performance: (a) LBC10; (b) LBC15; (c)

23 LBC20; (d) LBC25;

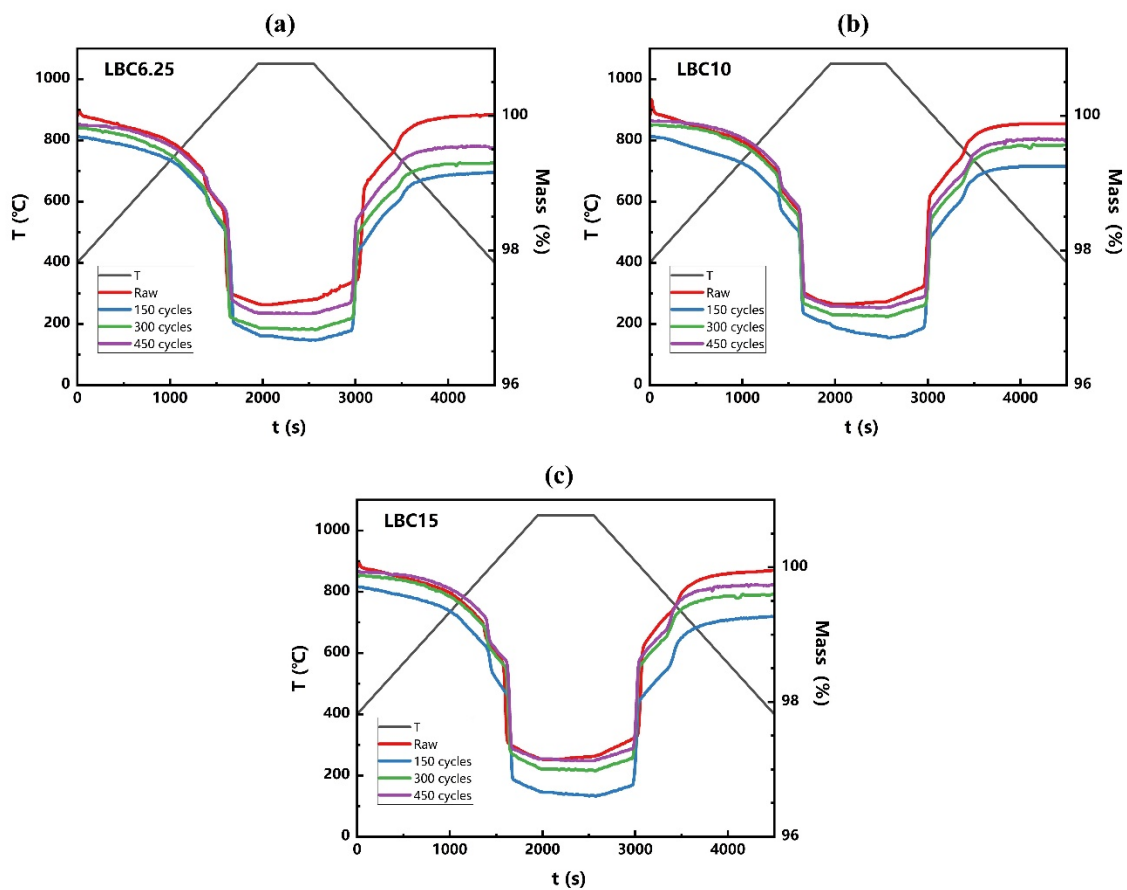

24

25 **Figure S5.** The raw TG data for the cyclic reactions: (a) LBC6.25; (b) LBC10; (c) LBC15;

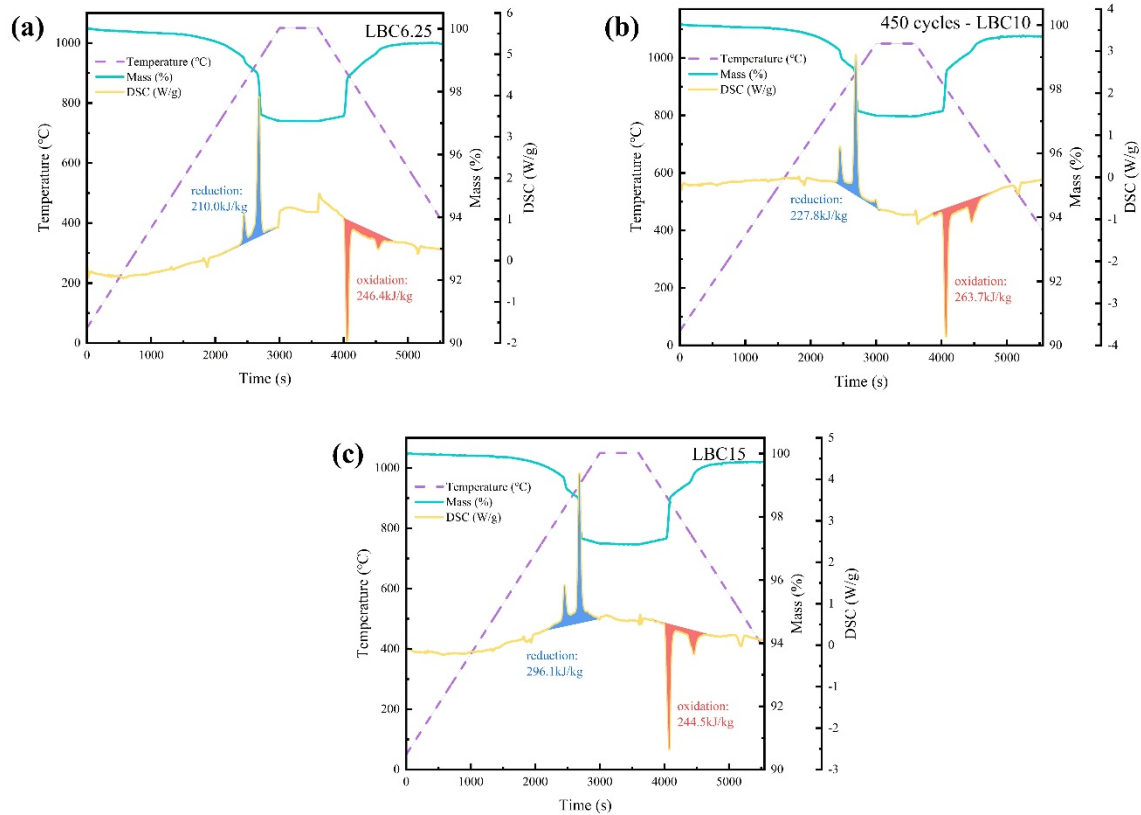

26

27 **Figure S6.** DSC results of the thermal storage performance after 450 cycles: (a) LBC6.25;

28 (b) LBC10; (c) LBC15;

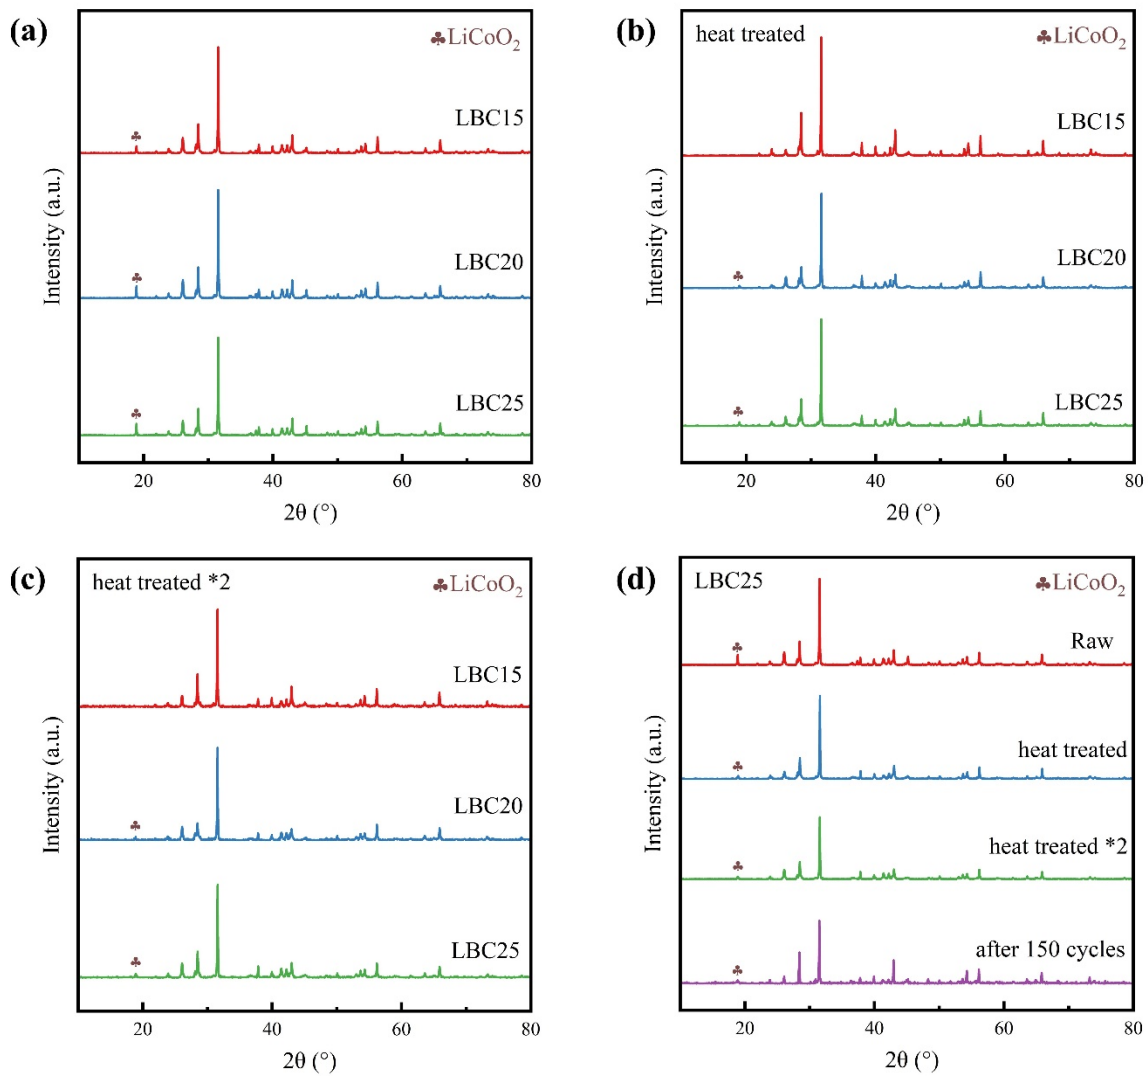

29

30 **Figure S7.** XRD patterns of LBC15, LBC20, and LBC25 before and after thermal  
 31 treatment: (a) raw samples; (b) samples after thermal treatment; (c) samples after second  
 32 thermal treatment; (d) comparison of LBC25 XRD patterns before and after thermal  
 33 treatment and cycling tests.

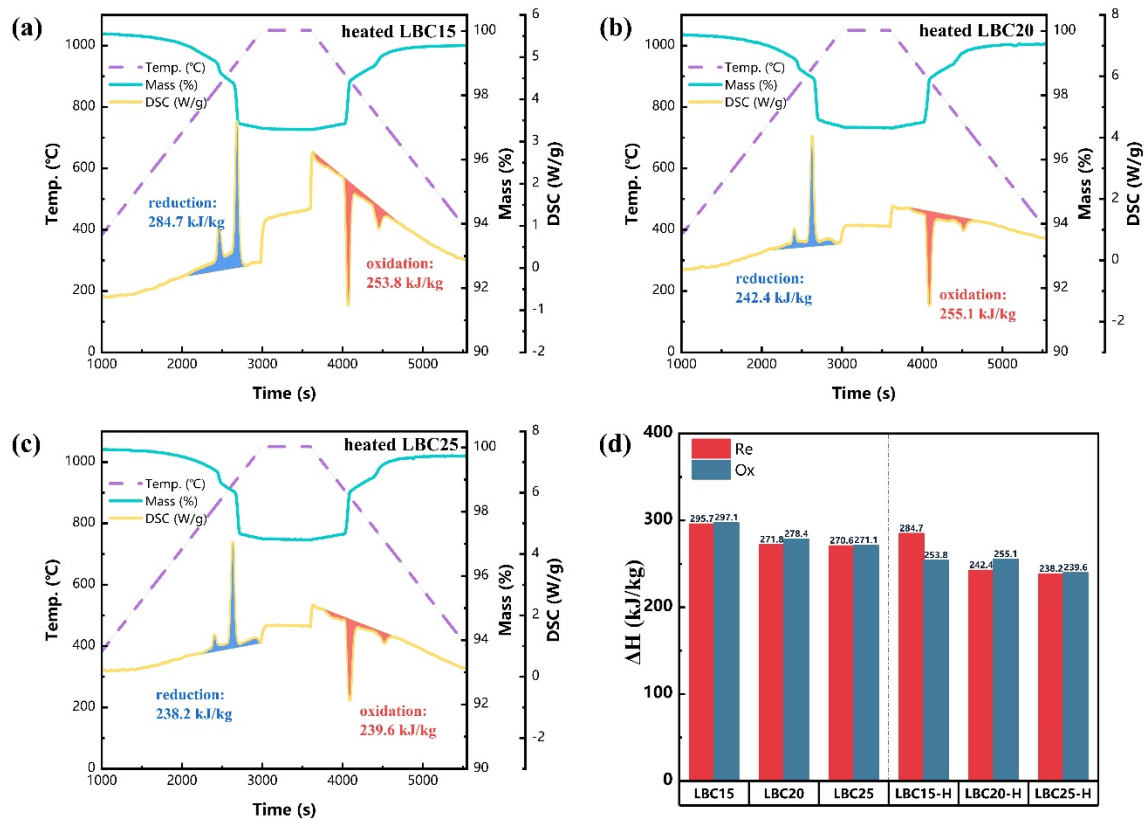

34

35 **Figure S8.** Thermochemical energy storage performance of samples after thermal

36 treatment: (a) LBC15; (b) LBC20; (c) LBC25; (d) comparison of heat storage density

37 before and after thermal treatment.

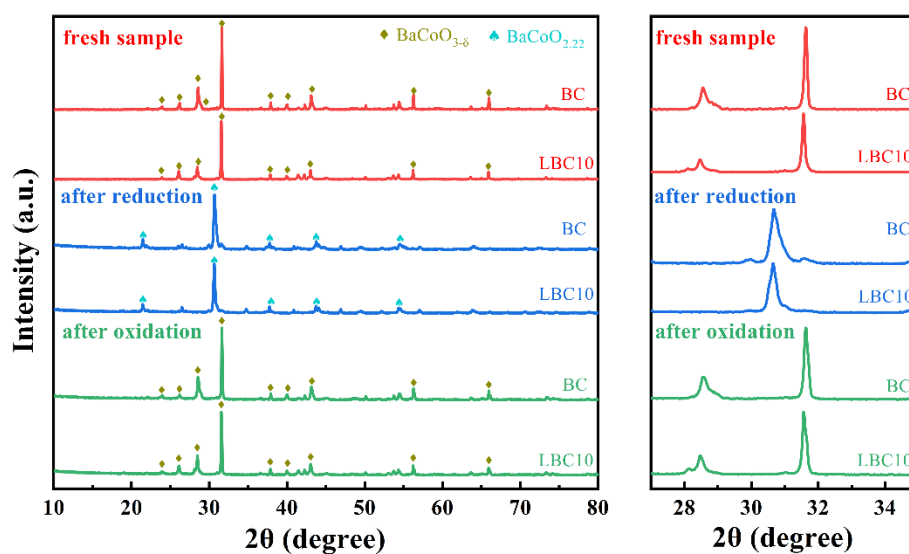

38

39 **Figure S9.** XRD patterns of BC and LBC10 before and after reduction and oxidation;



40

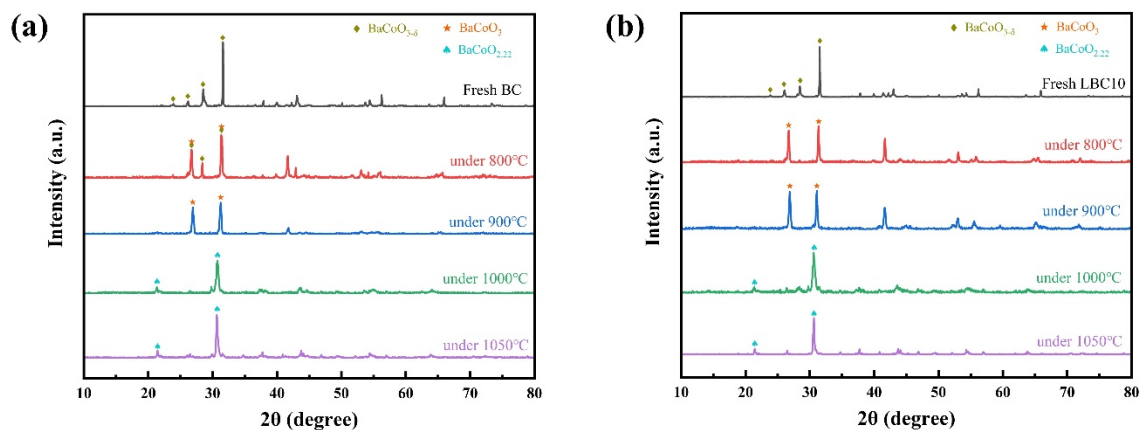

41

42 **Figure S10.** The crystal phase composition changes during reduction at 800-1050 °C

43 characterized by XRD: (a) BC; (b) LBC10;

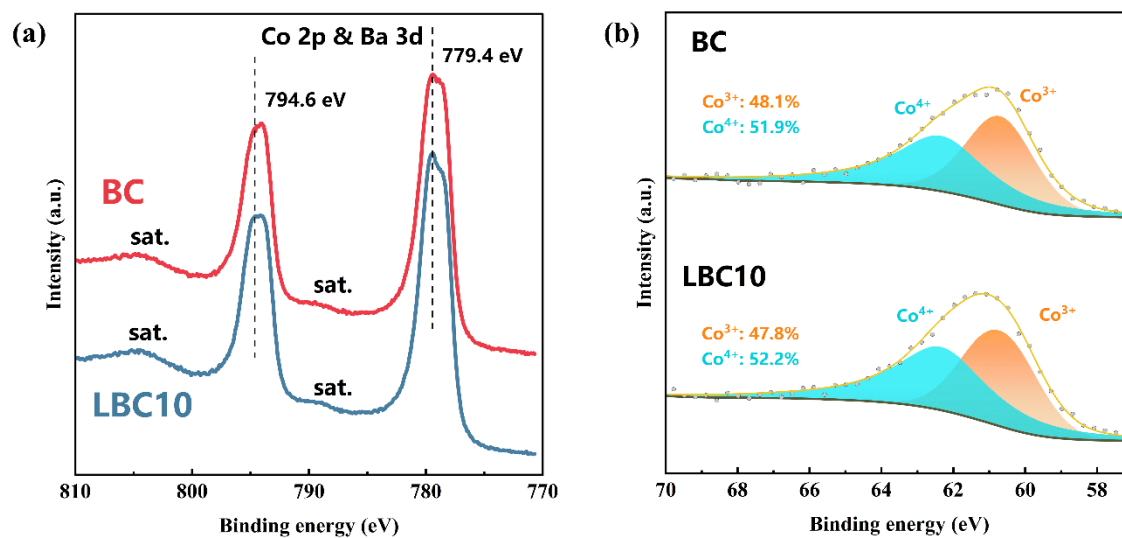

44

45 **Figure S11.** XPS spectra analysis: (a) Comparison of XPS Co 2p and Ba 3d spectra for

46 raw BC and LBC10; (b) Comparison of XPS Co 3p spectra for raw BC and LBC10;

47 **Table S2.** The Li content in LBC10 and LBC15 before and after 450 cycles (via ICP,

48 where the mass fraction refers to the proportion of Li in the total mass of metal elements

49 within the mixed metal oxides)

| Sample name | Initial mass fraction of Li | Initial stoichiometric ratio of Li | Mass fraction of Li after 450 cycles | Stoichiometric ratio of Li after 450 cycles |
|-------------|-----------------------------|------------------------------------|--------------------------------------|---------------------------------------------|
| LBC10       | 0.278%                      | 0.100                              | 0.260%                               | 0.088                                       |
| LBC15       | 0.445%                      | 0.143                              | 0.428%                               | 0.129                                       |
